# Supplementary material for: Mechanism of Generation of ZnO Microstructures by Microwave-Assisted Hydrothermal Approach
Source: Materials (Basel). 2013 Jun 18;6(6):2497–507. doi: 10.3390/ma6062497 (PMC5458951; doi:10.3390/ma6062497)
Supplement: Supplementary File 1 [file materials-06-02497-s001.pdf]

Article

**Figure S1.** Temperature profile of the reaction system during synthesis at of ZnO microrods (Hold temp: 170 °C, Hold time 20 min).

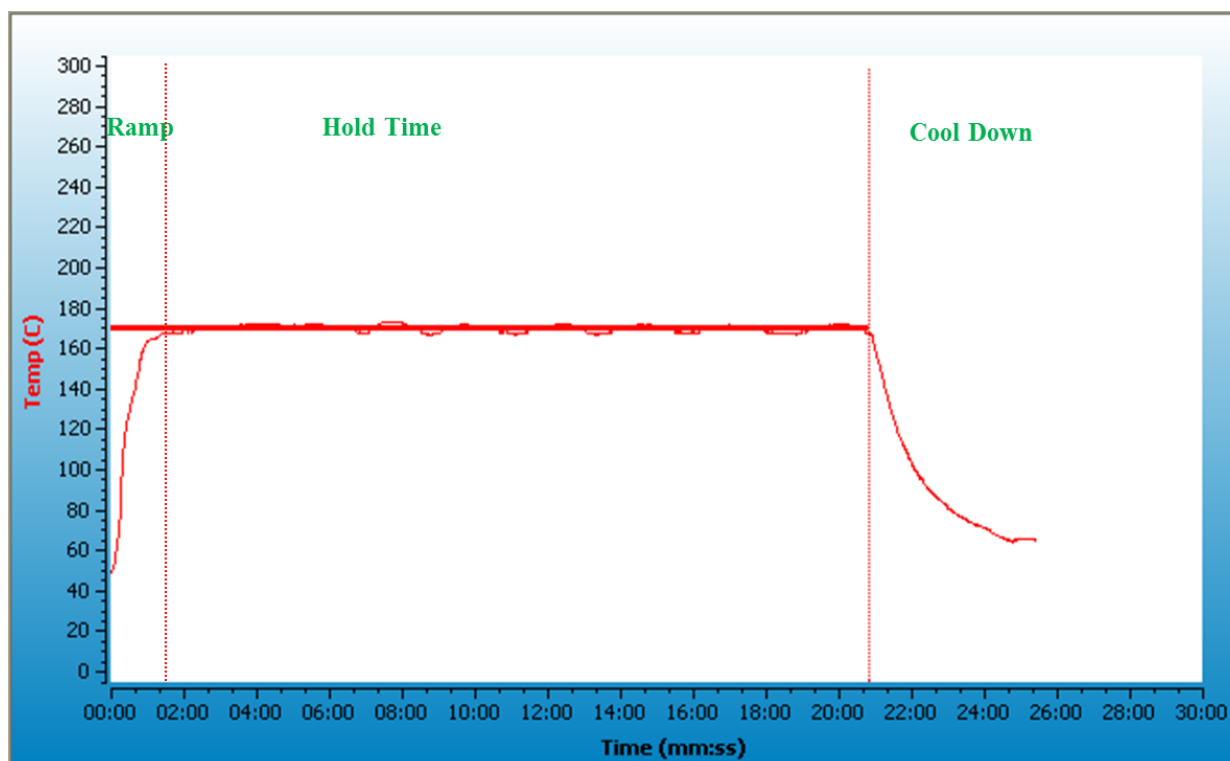

© 2013 by the authors; licensee MDPI, Basel, Switzerland. This article is an open access article distributed under the terms and conditions of the Creative Commons Attribution license (<http://creativecommons.org/licenses/by/3.0/>)
